# Supplementary material for: Metastatic spread in patients with gastric cancer
Source: PubMed Central journal article supplement (PMC5239553; doi:10.18632/oncotarget.10740), 2016-07-20
Supplement: oncotarget-07-52307-s001.pdf [file oncotarget-07-52307-s001.pdf]

# Metastatic spread in patients with gastric cancer

## Supplementary Materials

**Supplementary Table S1: Distribution of metastases in stomach cancer by stage and number of metastases**

| Stage | Number of metastases | Patients with metastases |      | Lung |     | Peritoneum |     | Liver |     | Other gastro-intestinal |        | Bone    |     | Nervous system |      | Other |      |         |    |      |    |     |  |
|-------|----------------------|--------------------------|------|------|-----|------------|-----|-------|-----|-------------------------|--------|---------|-----|----------------|------|-------|------|---------|----|------|----|-----|--|
|       |                      | N                        | %    | N    | %   | N          | %   | N     | %   | N                       | %      | N       | %   | N              | %    | N     | %    | N       | %  |      |    |     |  |
| N0M0  | 0                    | 1215                     |      |      |     |            |     |       |     |                         |        |         |     |                |      |       |      |         |    |      |    |     |  |
|       | 1                    | 183                      | 100% | 5    | 3%  | 67         | 37% | 57    | 31% | 13                      | 7%     | 8       | 4%  | 5              | 3%   | 31    | 17%  |         |    |      |    |     |  |
|       | 2                    | 55                       | 100% | 11   | 20% | 22         | 40% | 25    | 45% | 14                      | 25%    | 7       | 13% | 3              | 5%   | 21    | 38%  |         |    |      |    |     |  |
|       | 3+                   | 34                       | 100% | 18   | 53% | 20         | 59% | 17    | 50% | 7                       | 21%    | 12      | 35% | 3              | 9%   | 23    | 68%  |         |    |      |    |     |  |
| N+M0  | 0                    | 930                      |      |      |     |            |     |       |     |                         |        |         |     |                |      |       |      |         |    |      |    |     |  |
|       | 1                    | 335                      | 100% | 17   | 5%  | 112        | 33% | 89    | 27% | 26                      | 8%     | 43      | 13% | 9              | 3%   | 43    | 13%  |         |    |      |    |     |  |
|       | 2                    | 121                      | 100% | 32   | 26% | 37         | 31% | 60    | 50% | 26                      | 21%    | 18      | 15% | 5              | 4%   | 41    | 34%  |         |    |      |    |     |  |
|       | 3+                   | 63                       | 100% | 29   | 46% | 27         | 43% | 37    | 59% | 16                      | 25%    | 20      | 32% | 7              | 11%  | 38    | 60%  |         |    |      |    |     |  |
| M1    | 1                    | 818                      | 100% | 34   | 4%  | 225        | 28% | 0.02  | 438 | 54%                     | 2%     | <0.0001 | 46  | 6%             | 0.14 | 10    | 1%   | <0.0001 | 59 | 7%   |    |     |  |
|       | 2                    | 284                      | 100% | 96   | 34% | 92         | 32% | 0.45  | 189 | 67%                     | 0.0005 | 32      | 11% | 0.004          | 45   | 16%   | 0.88 | 15      | 5% | 0.83 | 92 | 32% |  |
|       | 3+                   | 139                      | 100% | 66   | 47% | 67         | 48% | 0.33  | 84  | 60%                     | 0.54   | 28      | 20% | 0.69           | 48   | 35%   | 0.91 | 13      | 9% | 0.91 | 78 | 56% |  |
|       |                      |                          |      |      |     |            |     |       |     |                         |        |         |     |                |      |       |      |         |    |      |    |     |  |

P-values are two-sided, comparing the proportion of specific metastases between stages, separately depending on the number of metastases. Metastases were diagnosed any period between the initial cancer diagnosis and death.

**Supplementary Table S2: Distribution of metastases in gastric cancer by age and number of metastatic sites between diagnosis and death**

| Age   | Number of metastases | Patients with metastases |      |            |     |       |     |                         |     |                |   | Other |     |       |   |      |     |       |   |    |     |          |   |    |     |      |   |   |   |  |  |
|-------|----------------------|--------------------------|------|------------|-----|-------|-----|-------------------------|-----|----------------|---|-------|-----|-------|---|------|-----|-------|---|----|-----|----------|---|----|-----|------|---|---|---|--|--|
|       |                      | Lung                     |      | Peritoneum |     | Liver |     | Other gastro-intestinal |     | Nervous system |   | Bone  |     | Other |   | Bone |     | Other |   |    |     |          |   |    |     |      |   |   |   |  |  |
|       |                      | N                        | %    | N          | %   | N     | %   | N                       | %   | N              | % | N     | %   | N     | % | N    | %   | N     | % | N  | %   | N        | % | N  | %   | N    | % | N | % |  |  |
| < 60  | 1                    | 397                      | 100% | 12         | 3%  | 147   | 37% | 116                     | 29% |                |   | 22    | 6%  |       |   | 12   | 3%  |       |   | 46 | 12% |          |   | 42 | 11% |      |   |   |   |  |  |
|       | 2                    | 167                      | 100% | 40         | 24% | 61    | 37% | 81                      | 49% |                |   | 34    | 20% |       |   | 8    | 5%  |       |   | 38 | 23% |          |   | 64 | 38% |      |   |   |   |  |  |
|       | 3+                   | 112                      | 100% | 49         | 44% | 62    | 55% | 57                      | 51% |                |   | 24    | 21% |       |   | 12   | 11% |       |   | 43 | 38% |          |   | 87 | 78% |      |   |   |   |  |  |
| 60-69 | 1                    | 537                      | 100% | 28         | 5%  | 177   | 33% | 215                     | 40% |                |   | 25    | 5%  |       |   | 15   | 3%  |       |   | 44 | 8%  |          |   | 33 | 6%  |      |   |   |   |  |  |
|       | 2                    | 214                      | 100% | 55         | 26% | 80    | 37% | 127                     | 59% |                |   | 28    | 13% |       |   | 11   | 5%  |       |   | 40 | 19% |          |   | 72 | 34% |      |   |   |   |  |  |
|       | 3+                   | 111                      | 100% | 50         | 45% | 55    | 50% | 64                      | 58% |                |   | 18    | 16% |       |   | 15   | 14% |       |   | 33 | 30% |          |   | 81 | 73% |      |   |   |   |  |  |
| 70-79 | 1                    | 612                      | 100% | 27         | 4%  | 156   | 25% | 296                     | 48% |                |   | 34    | 6%  |       |   | 8    | 1%  |       |   | 32 | 5%  |          |   | 59 | 10% |      |   |   |   |  |  |
|       | 2                    | 183                      | 100% | 61         | 33% | 45    | 25% | 114                     | 62% |                |   | 29    | 16% |       |   | 10   | 5%  |       |   | 26 | 14% |          |   | 68 | 37% |      |   |   |   |  |  |
|       | 3+                   | 70                       | 100% | 40         | 57% | 31    | 44% | 42                      | 60% |                |   | 12    | 17% |       |   | 2    | 3%  |       |   | 21 | 30% |          |   | 52 | 74% |      |   |   |   |  |  |
| > 79  | 1                    | 399                      | 100% | 22         | 6%  | 90    | 23% | 221                     | 55% | < 0.0001       |   | 21    | 5%  | 0.9   |   | 2    | 1%  | 0.02  |   | 14 | 4%  | < 0.0001 |   | 29 | 7%  | 0.05 |   |   |   |  |  |
|       | 2                    | 94                       | 100% | 35         | 37% | 23    | 24% | 59                      | 63% | 0.009          |   | 21    | 22% | 0.13  |   | 3    | 3%  | 0.85  |   | 5  | 5%  | 0.002    |   | 34 | 36% | 0.8  |   |   |   |  |  |
|       | 3+                   | 29                       | 100% | 21         | 72% | 7     | 24% | 24                      | 83% | 0.02           |   | 11    | 38% | 0.06  |   | 0    | 0%  | 0.03  |   | 8  | 28% | 0.44     |   | 16 | 55% | 0.11 |   |   |   |  |  |

P-values are two-sided, comparing the proportion of specific metastases between age groups, separately depending on the number of metastases.
